# Supplementary material for: Well-dispersed ultrafine Mn3O4 nanocrystals on reduced graphene oxide with high electrochemical Li-storage performance
Source: Royal Society of Chemistry journal article supplement (doi:10.1039/c4nj00790e), 2014-01-01
Supplement: c4nj00790e1.pdf [file c4nj00790e1.pdf]

## Electronic Supplementary Information

### **Well-dispersed ultrafine Mn<sub>3</sub>O<sub>4</sub> nanocrystal on reduced graphene oxide with high electrochemical Li-storage performance**

**Hui Huang, Liyuan Zhang, Yang Xia, Yongping Gan, Xinyong Tao, Chu Liang,  
Wenkui Zhang\***

*College of Materials Science and Engineering, Zhejiang University of Technology,  
Hangzhou, 310014, P. R. China.*

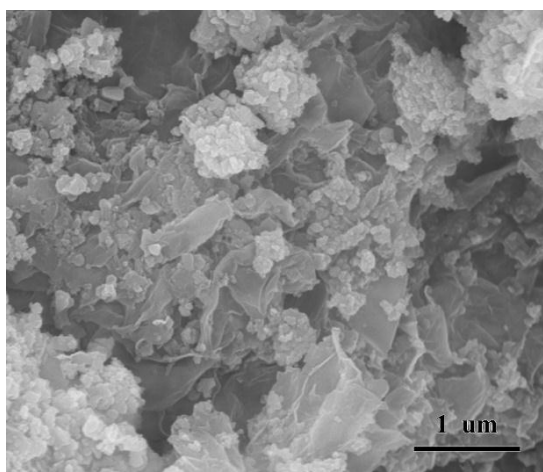

**Figure S1** SEM image of the Mn<sub>3</sub>O<sub>4</sub>/r-GO composite synthesized without adding  
H<sub>2</sub>O<sub>2</sub>

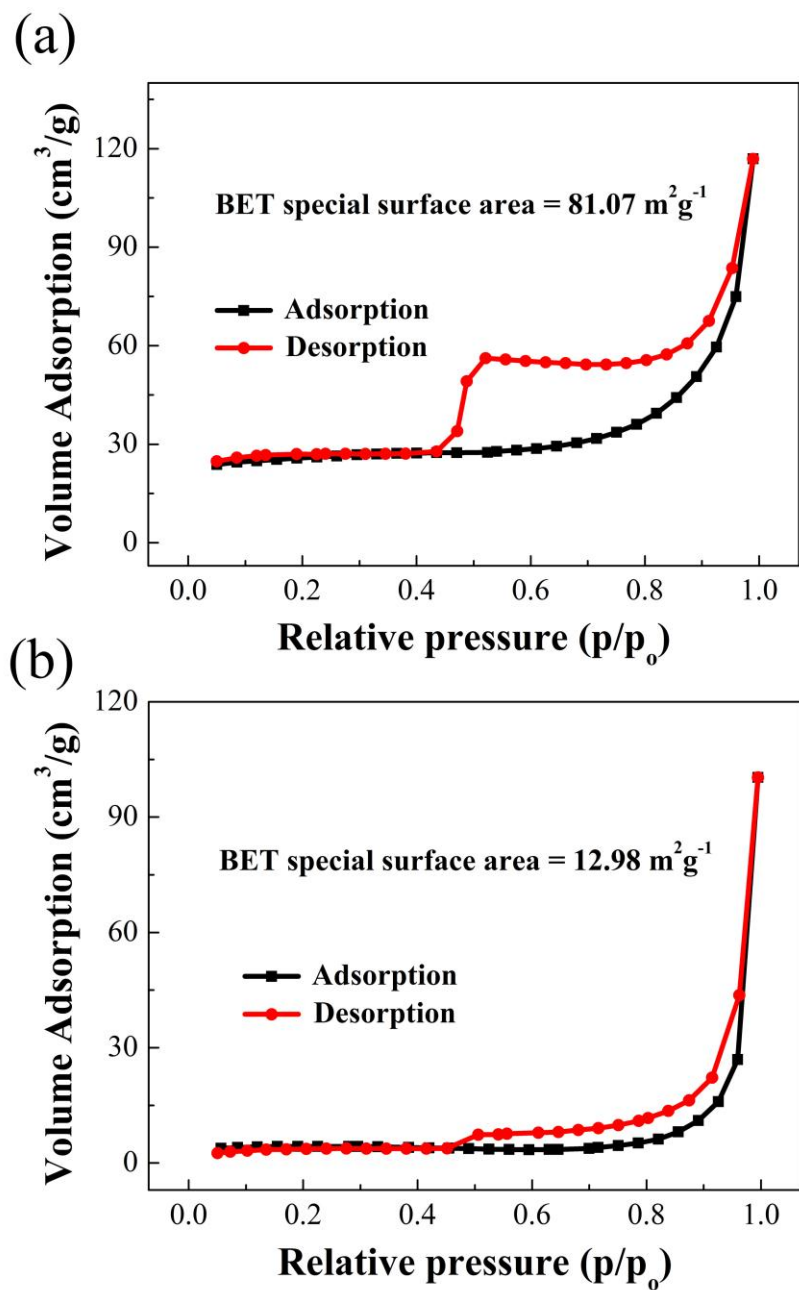

**Figure S2** Nitrogen adsorption-desorption isotherms of the two  $\text{Mn}_3\text{O}_4/\text{r-GO}$  composite synthesized (a) with or (b) without addition  $\text{H}_2\text{O}_2$

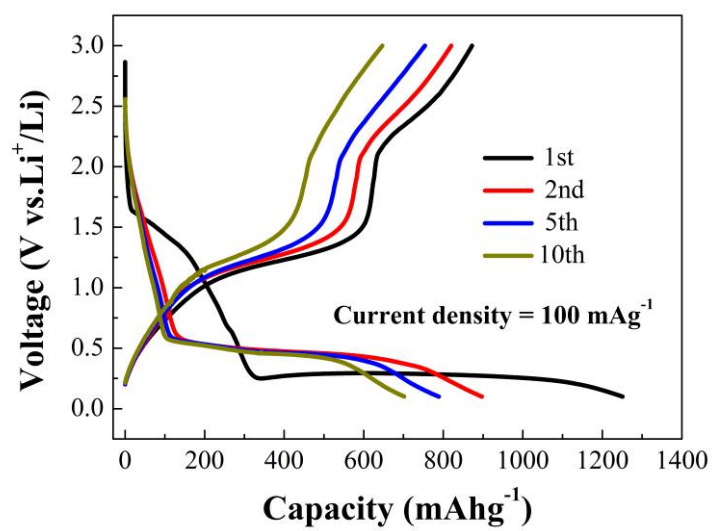

**Figure S3** Galvanostatic charge-discharge profiles of the  $\text{Mn}_3\text{O}_4/\text{r-GO}$  composite synthesized without adding  $\text{H}_2\text{O}_2$
